# Supplementary material for: hsa_circ_0000006 induces tumorigenesis through miR-361-3p targeting immunoglobulin-like domains protein 1 (LRIG1) in osteosarcoma
Source: PubMed Central journal article supplement — Ann Transl Med. 2021 Aug;9(15):1242. doi: 10.21037/atm-21-3076 (PMC8421976; doi:10.21037/atm-21-3076), 2021-08
Supplement: atm-09-15-1242-dss.pdf [file atm-09-15-1242-dss.pdf]

## Data Sharing Statement

|                     |                                                                                                                                                     |                                                                                                                                                                                |
|---------------------|-----------------------------------------------------------------------------------------------------------------------------------------------------|--------------------------------------------------------------------------------------------------------------------------------------------------------------------------------|
| <b>Article Info</b> | <a href="https://dx.doi.org/10.21037/atm-21-3076">https://dx.doi.org/10.21037/atm-21-3076</a>                                                       |                                                                                                                                                                                |
| <b>Item</b>         | <b>Question</b>                                                                                                                                     | <b>Authors' Response<br/>(place "-" if not applicable)</b>                                                                                                                     |
| 1                   | Would you like to share data collected for your study to others?                                                                                    | Yes.                                                                                                                                                                           |
| 2                   | If not, would you like to share the reason for your decision?                                                                                       | -                                                                                                                                                                              |
| 3                   | What data in particular will be shared?                                                                                                             | The GEO data in particular will be shared, and we also found a correlation between the miR-361-3p and LRIG1/ hsa_circ_0000006, which was rare reported in previous researches. |
| 4                   | Any other documents will be shared? Such as study protocol, statistical analysis plan, informed consent form, clinical study report, analytic code. | Statistical analysis, material and methods will be shared if requested.                                                                                                        |
| 5                   | When will data availability begin?                                                                                                                  | From the publication date.                                                                                                                                                     |
| 6                   | When will data availability end?                                                                                                                    | One years within the publication date, since the technique may be updated over time.                                                                                           |
| 7                   | To whom will you share the data?                                                                                                                    | Medical oncologists and sarcoma professors who are interested in studies of miR-361-3p.                                                                                        |
| 8                   | For what type of analysis or purpose?                                                                                                               | For analysis to evaluate the safety of miR-361-3p in osteosarcoma animals.                                                                                                     |
| 9                   | How or where can the data/documents be obtained?                                                                                                    | Emails could be sent to the address below to obtain the shared data:<br>3151093997@qq.com                                                                                      |
| 10                  | Any other restrictions?                                                                                                                             | We may balance the potential benefits and risks for each request and then provide the data that could be shared.                                                               |
